# Supplementary material
Source: Royal Society of Chemistry journal article supplement (doi:10.1039/d6tc00688d)
Supplement: d6tc00688d1.pdf [file d6tc00688d1.pdf]

## Supporting Information for: Order-disorder phase transition and orientational defect formation in a hybrid organic-inorganic piezoelectric material

Kasper Tolborg<sup>1,\*</sup>

<sup>1</sup>*Department of Chemistry and Bioscience, Aalborg University,  
Fredrik Bajers Vej 7H, 9220 Aalborg Ø, Denmark*

(Dated: May 1, 2026)

### SUPPORTING FIGURES

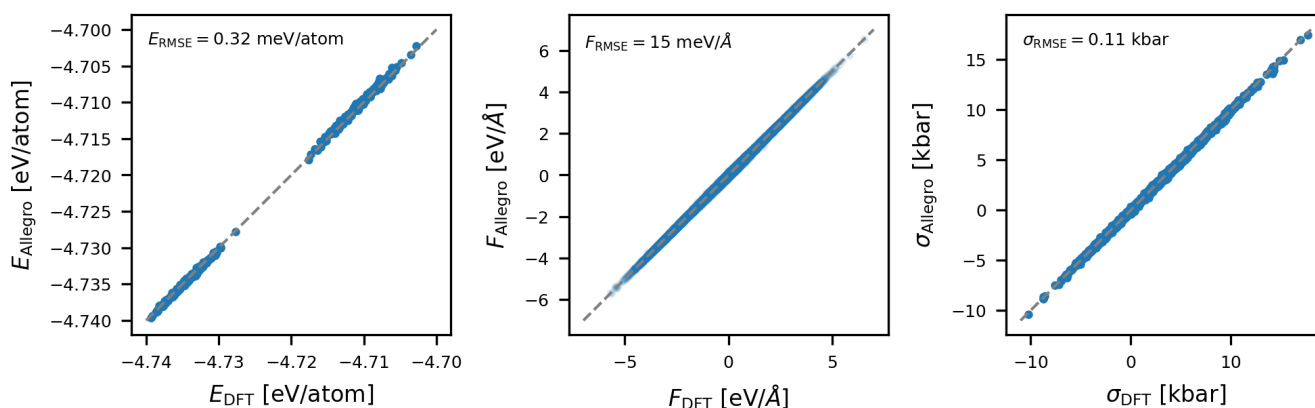

FIG. S1. Parity plot showing the agreement between density functional theory calculation with the PBEsol functional and the trained Allegro machine learning force field for per atom energies, force components and stress components on a hold out test set.

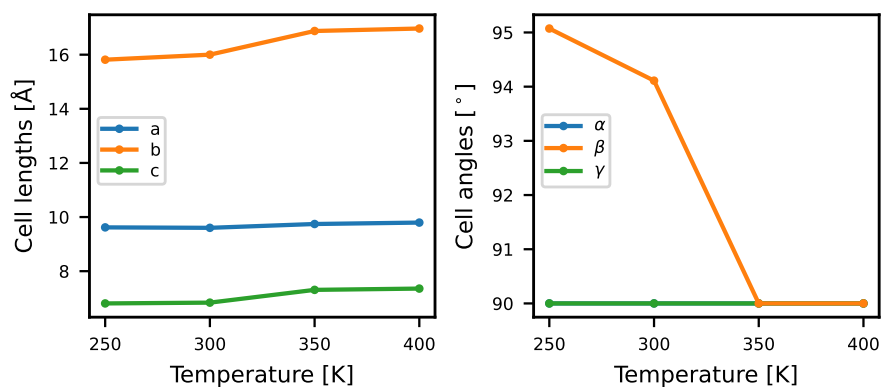

FIG. S2. Cell parameters (unit cell lengths and angles) from MLFF MD simulations in the NPT ensemble for the trained Allegro MLFF without inclusion of dispersion interactions. The phase transition temperature is significantly underestimated. The agreement with experiment is improved by inclusion of dispersion interaction as seen in Figure 2 in the main text.

\* kato@bio.aau.dk

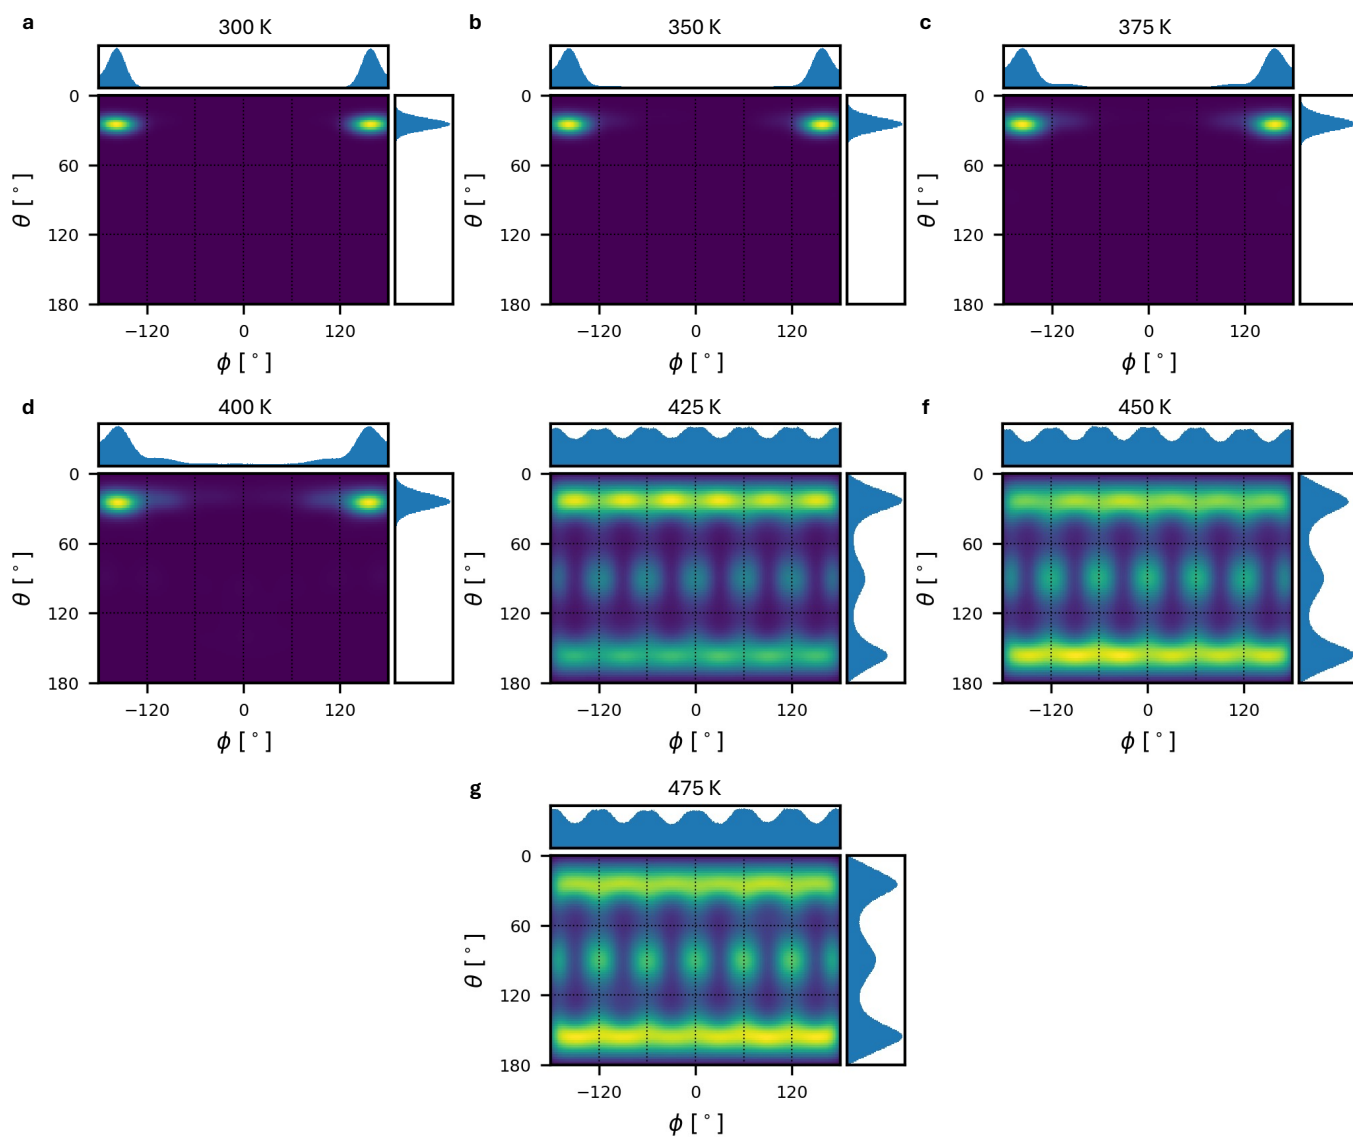

FIG. S3. Density map of orientations of TCM dipolar cations **a** 300 K, **b** 350 K, **b** 375 K, **d** 400 K, **e** 425 K, **f** 450 K, and **g** 475 K.
